# Supplementary material
Source: PubMed Central journal article supplement (PMC3867288)
Supplement: NIHMS535457-supplement-1_si_001.pdf [file NIHMS535457-supplement-1_si_001.pdf]

## Supporting Information:

# Experimental and Computational X-ray Emission Spectroscopy as a Direct Probe of Protonation States in Oxo-Bridged Mn<sup>IV</sup>-Dimers Relevant to Redox-active Metalloproteins

Benedikt Lassalle-Kaiser<sup>†&‡</sup>, Thaddeus T. Boron III<sup>‡±</sup>, Vera Krewald<sup>†‡</sup>, Jan Kern<sup>†#</sup>, Martha A. Beckwith<sup>+§</sup>, Mario U. Delgado-Jaime<sup>+</sup>, Henning Schroeder<sup>†€</sup>, Roberto Alonso-Mori<sup>#</sup>, Dennis Nordlund<sup>#</sup>, Tsu-Chien Weng<sup>#</sup>, Dimosthenis Sokaras<sup>#</sup>, Frank Neese<sup>+</sup>, Uwe Bergmann<sup>#</sup>, Vittal K. Yachandra<sup>†</sup>, Serena DeBeer<sup>+§\*</sup>, Vincent L. Pecoraro<sup>‡\*</sup>, Junko Yano<sup>†\*</sup>

<sup>†</sup> Physical Bioscience Division, Lawrence Berkeley National Laboratory, Berkeley, California 94720, USA

<sup>‡</sup> Department of Chemistry, University of Michigan, Ann Arbor, Michigan 48109, USA.

<sup>+</sup> Max Planck Institute for Chemical Energy Conversion, Stiftstr. 34-36, 45470 Mülheim an der Ruhr, Germany.

<sup>#</sup> SLAC National Accelerator Laboratory, Menlo Park, California 94025, USA

<sup>§</sup> Department of Chemistry and Chemical Biology, Cornell University, Ithaca, New York 14853, USA.

## Index

|                                                                                                     |      |
|-----------------------------------------------------------------------------------------------------|------|
| Chart S1. Geometric details for the optimized geometries                                            | p. 2 |
| Figure S1. Experimental XES valence-to-core difference spectra                                      | p. 3 |
| Figure S2. Background-subtracted normalized valence-to-core regions and 2 <sup>nd</sup> derivatives | p. 3 |
| ORCA input file examples for calculation of valence-to-core X-ray emission spectra                  | p. 4 |
| Table S1. Area and IWAE values incl. std. dev. for reference monomer data and dimers                | p. 5 |
| References used in the SI                                                                           | p. 5 |

## Geometric Details

**Chart S1.** Geometric details for the optimized geometries of **1**, **2**, **3a** and **3b** in comparison to EXAFS data from Ref. 1, given in italics where applicable.

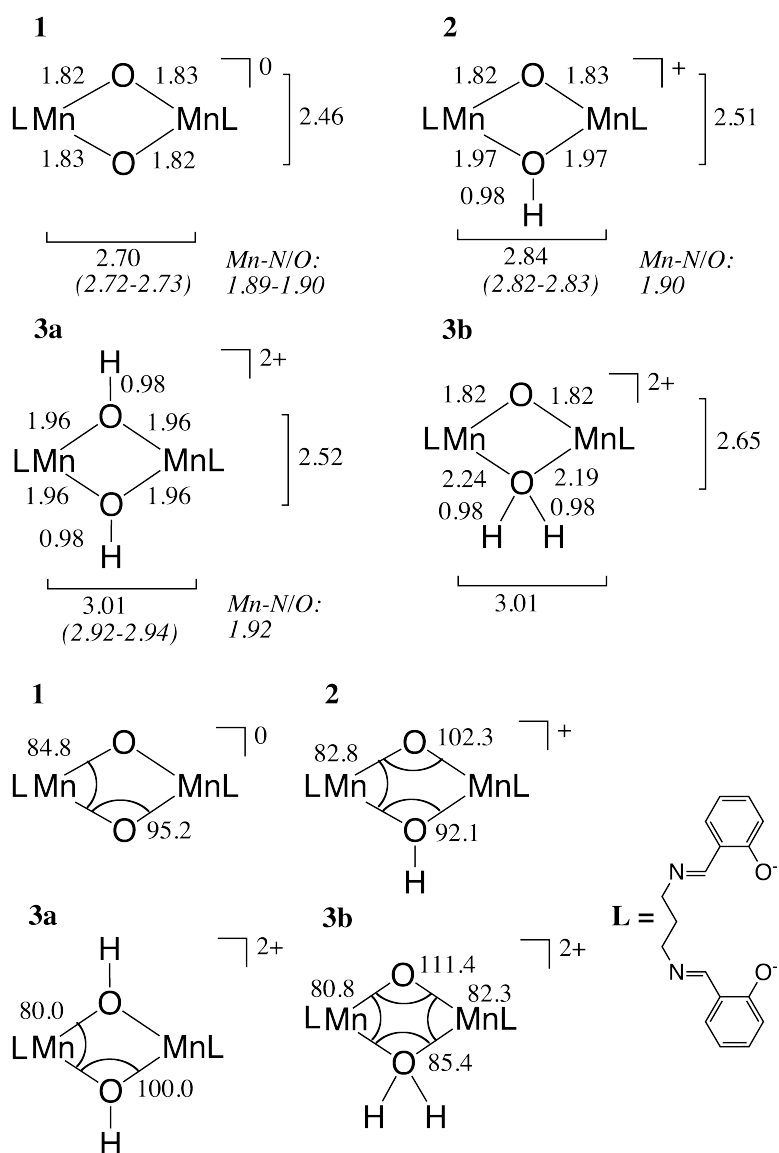

**Figure S1. Experimental XES valence-to-core difference spectra of the *salpn* dimer series.** The red dotted line corresponds to the difference spectrum of compound 2 with compound 1, the blue dashed line to the difference spectrum of compound 3 with compound 1. The changes in the  $K\beta''$  region are the most important, with the intensity for (3-1) at  $\sim 6520$  eV approximately twice the intensity of that for (2-1). The shoulder to the  $K\beta_{2,5}$  peak at  $\sim 6530$  eV is represented as positive difference intensity of the same magnitude, whereas the main peak is represented with negative difference intensity.

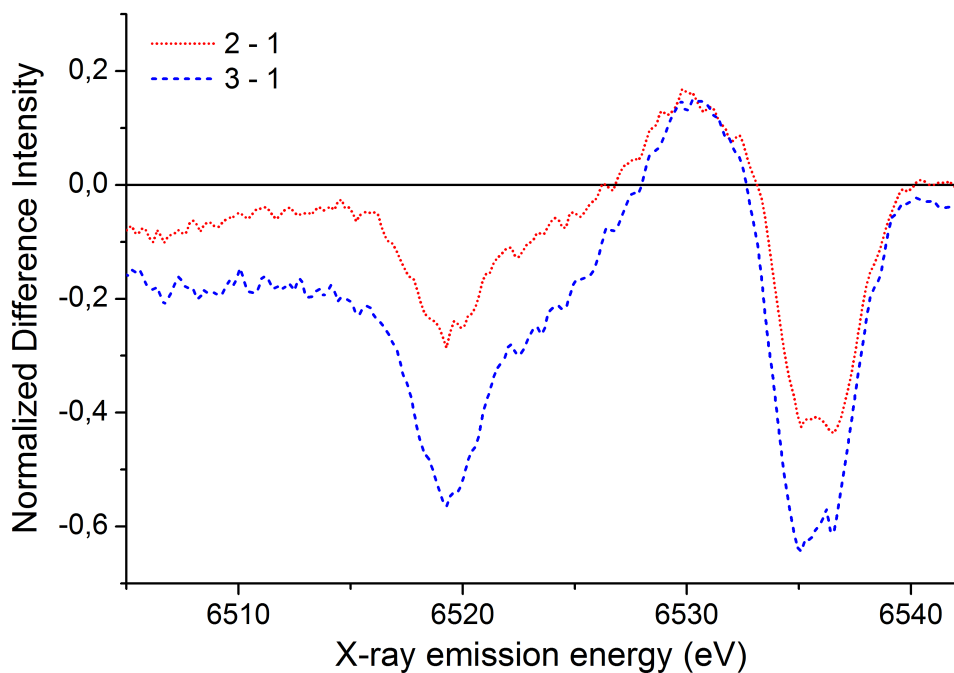

**Figure S2. Background-subtracted normalized valence-to-core regions (bottom) and their 2<sup>nd</sup> derivatives (top) for complexes 1 (black, shifted up by 0.4 units on the y-axis), 2 (red, at 0 on the y-axis), and 3 (blue, shifted down by 0.4 units on the y-axis).** The 2<sup>nd</sup> derivatives were generated from the 1<sup>st</sup> derivatives, with a 10-point ( $\sim 1.45$  eV) Savitzky-Golay smooth of 2<sup>nd</sup> order in each derivative step.

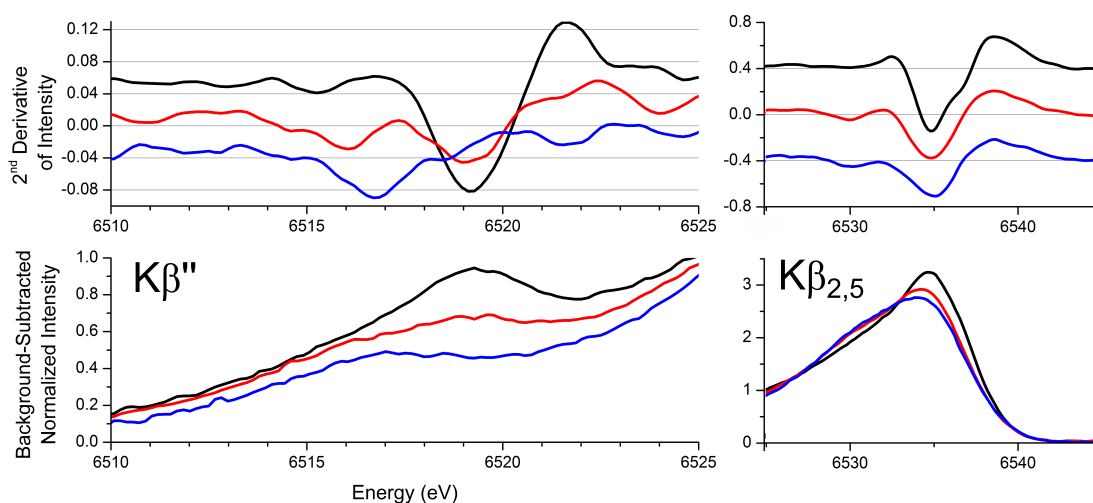

## Input file examples for the calculation of valence-to-core X-ray emission spectra with a one-electron approach

The implementation of the one-electron approach has been described in Ref. 2, and the calculation setup used in this work was introduced in Ref. 3. This is a description of an input file for an XES valence-to-core calculation with the ORCA program package.<sup>4</sup> Each keyword can be modified according to the requirements of the calculation; please refer to the ORCA manual or the ORCA JumpStartGuide for other keywords (invoking other functionals, basis sets, solvent models, relativistic corrections etc.). The latest release and the manual can be found at

<http://www.ccc.mpg.de/downloads>

or

[www.ccc.mpg.de/forum/portal.php](http://www.ccc.mpg.de/forum/portal.php)

```
! SP BP def2-TZVP(-f) ZORA COSMO(CH2Cl2) grid4 NoFinalGrid SOMF(1X)
% xes
  coreorb 0,0,1,1
  orbop 0,1,0,1
  doSOC true
  coreorbSOC 0,1,2,3
end
* xyz 0 7
...
*
```

The exclamation point (!) indicates the start of a 'simple input line'.

**SP:** keyword for a single point calculation

**BP:** selects the functional BP

**def2-TZVP(-f):** selects the basis set def2-TZVP(-f)

**ZORA:** invokes the 0<sup>th</sup> order relativistic approximation

**COSMO(CH<sub>2</sub>Cl<sub>2</sub>):** models a solvent with the properties of CH<sub>2</sub>Cl<sub>2</sub> using COSMO<sup>5</sup>.

**Grid4, NoFinalGrid:** specifies the integration grid size settings for the calculation. Increasing the grid will make the calculations more accurate, but also more expensive in terms of computational costs. Refer to the manual for default values.

**SOMF(1X):** invokes the use of the spin orbit mean field approximation for the SOC operator, as discussed in Ref. 3.

The percentage sign (%) indicates the start of a 'methods block', which is terminated with an **end**.

**xes:** specifies the block for the calculation of X-ray emission spectra

The next two keywords and the numbers specifying the core orbital properties depend on each other:

**coreorb 0,0,1,1:** specifies the core orbitals

**orbop 0,1,0,1:** specifies the orbital operators for the core orbitals

Here, the core orbitals **0** (on Mn1) and **1** (on Mn2) with the operators **0,1** (Mn1) and **0,1** (Mn2) are chosen. Operator 0 refers to  $\alpha$  electrons; operator 1 refers to  $\beta$  electrons. The core orbitals can be recognized from the output of a previous calculation (for instance, a geometry optimization with the 'largeprint' keyword in the simple input line). For transition metal ions with only light C/N/O/H atoms in the ligand, they are usually the energetically lowest lying ones. For molecules with heavier halides however, the 1s orbitals of the metals can have higher energies than those of the halides.

**doSOC true:** use spin-orbit coupling

**coreorbSOC 0,1,2,3:** specifies the spin-orbit coupled core orbitals

The coordinates are given after a line specifying

\*xyz 0 7

where xyz indicates the use of Cartesian coordinates and the numbers 0 and 7 refer to the total charge and multiplicity of the molecule, respectively. The coordinates (...) end with a second asterisk \*.

The spectra can be plotted with the orca\_mapspc program, resulting in a file.dat file (line spectrum) and a file.stk file (stick spectrum):

```
orca_mapspc file.out XESSOC -x05730 -x16485 -w2.0 -n4000
```

where **file.out** is the output file of the XES calculation; **XESSOC** specifies the type of spectrum to plot (use XES if you did not use SOC); **-x0** and **-x1** give the energy axis range (here 5730 eV to 6485 eV, remember to shift the calculated spectra by 59.2 eV for the setup above); **-w2.0** specifies the artificial broadening used to get the line spectrum in the **file.dat** file from the transitions stored in the **file.stk** file; **-n** specifies the number of points for the line spectrum, here 4000.

**Table S1. Experimental and calculated areas for the reference monomer data used in the correlation plot Figure 8.**

| Compound |                                                                                   | Experiment |           | Calculation |
|----------|-----------------------------------------------------------------------------------|------------|-----------|-------------|
| #        | Name                                                                              | Area       | std. dev. | Area        |
| 1        | [Mn(II)(acac) <sub>2</sub> ]                                                      | 14.88      | 1.25      | 8.50        |
| 2        | [Mn(II)( <sup>tert</sup> Bu <sub>3</sub> terpy) <sub>2</sub> ] <sup>2+</sup>      | 15.55      | 0.85      | 8.49        |
| 3        | [Mn(II)(terpy)Cl <sub>2</sub> ]                                                   | 16.49      | 0.64      | 7.93        |
| 4        | [Mn(II)(tolyterpy) <sub>2</sub> ] <sup>2+</sup>                                   | 16.90      | 1.69      | 8.44        |
| 5        | [Mn(II)(tpa)(NCS) <sub>2</sub> ]                                                  | 16.13      | 2.18      | 8.56        |
| 6        | [Mn(II)( <sup>tert</sup> Bu <sub>3</sub> terpy)(N <sub>3</sub> ) <sub>2</sub> ]   | 20.96      | 2.19      | 9.83        |
| 7        | [Mn(II)(CF <sub>3</sub> CO <sub>2</sub> ) <sub>2</sub> (terpy)(H <sub>2</sub> O)] | 17.62      | 0.82      | 7.42        |
| 8        | [Mn(II)(terpy)(NO <sub>3</sub> ) <sub>2</sub> (H <sub>2</sub> O)]                 | 16.47      | 1.19      | 7.13        |
| 9        | [Mn(III)(acac) <sub>3</sub> ]                                                     | 24.66      | 0.91      | 11.60       |
| 10       | [Mn(III)(bpea)(N <sub>3</sub> ) <sub>3</sub> ]                                    | 21.25      | 0.95      | 12.10       |
| 11       | [Mn(III)(salen)Cl]                                                                | 27.56      | 1.28      | 15.50       |
| 12       | [Mn(III)(terpy)Cl <sub>3</sub> ]                                                  | 18.42      | 0.99      | 10.00       |
| 13       | [Mn(III)(terpy)(N <sub>3</sub> ) <sub>3</sub> ]                                   | 25.67      | 1.74      | 12.70       |
| 14       | [Mn(III)(tolyterpy) <sub>2</sub> ] <sup>3+</sup>                                  | 30.29      | 1.48      | 13.10       |
| 15       | [Mn(IV)(Me <sub>3</sub> -tacn)(OMe) <sub>3</sub> ] <sup>+</sup>                   | 24.59      | 1.06      | 15.50       |
| 1        | [Mn(IV)(μ-O) <sub>2</sub> (salpn) <sub>2</sub> ]                                  | 45.40      | 1.60      | 19.13       |
| 2        | [Mn(IV)(μ-O)(μ-OH)(salpn) <sub>2</sub> ] <sup>1+</sup>                            | 41.28      | 0.79      | 19.76       |
| 3        | [Mn(IV)(μ-OH) <sub>2</sub> (salpn) <sub>2</sub> ] <sup>2+</sup>                   | 43.94      | 1.01      | 18.70       |

The standard deviations listed here result from all fits generated and were used in Figure 8 to display the error bars. An additional error of ±5% is estimated to occur from differences in background subtraction and data normalization.

## References

- (1) Baldwin, M. J.; Stemmler, T. L.; Riggs-Gelasco, P. J.; Kirk, M. L.; Penner-Hahn, J. E.; Pecoraro, V. L. *J. Am. Chem. Soc.* **1994**, *116*, 11349-11356.
- (2) Lee, N.; Petrenko, T.; Bergmann, U.; Neese, F.; DeBeer, S. *J. Am. Chem. Soc.* **2010**, *132*, 9715-9727.
- (3) Beckwith, M. A.; Roemelt, M.; Collomb, M.-N. I.; DuBoc, C.; Weng, T.-C.; Bergmann, U.; Glatzel, P.; Neese, F.; DeBeer, S. *Inorg. Chem.* **2011**, *50*, 8397-8409.
- (4) Neese, F. *WIREs Comput. Mol. Sci.* **2012**, *2*, 73-78.
- (5) Klamt, A.; Schüürmann, G. *J. Chem. Soc. Perkin Trans.* **1993**, *2*, 799-805.
